# Supplementary material for: Phylogenomics Reshuffles the Eukaryotic Supergroups
Source: PLoS One. 2007 Aug 29;2(8):e790. doi: 10.1371/journal.pone.0000790 (PMC1949142; doi:10.1371/journal.pone.0000790)
Supplement: Table S2 — OTU (Operational Taxonomic Unit) names, number of characters, and percentage of characters included in the final alignment (0.02 MB XLS) [file pone.0000790.s005.xls]

## Sheet: Names_short.otu
Table S2. OTU (Operational Taxonomic Unit) names, number of characters, and percentage of characters included in the final alignment
Taxon	Characters included in concatenated sequences	% characters included in concatenated sequences	Species in chimera
Acanthamoeba castellanii	15112	50.52
Alexandrium	7004	23.41	Alexandrium fundyense (2%), Alexandrium tamarense (43%)
Arabidopsis thaliana	29383	98.24
Bigelowiella natans	12789	42.76
Blastocystis hominis	11656	38.97
Chlamydomonas	19955	66.72	Chlamydomonas incerta (36%), Chlamydomonas reinhardtii (69%), Chlamydomonas sp (1%)
Cryptococcus neoformans	26795	89.59
Cryptosporidium	24814	82.96	Cryptosporidium hominis (16%), Cryptosporidium parvum (77%)
Cyanidioschyzon merolae	24066	80.46
Cyanophora paradoxa	13424	44.88
Dictyostelium discoideum	29206	97.65
Drosophila	29131	97.4	Drosophila melanogaster (92%), Drosophila pseudoobscura (4%), Drosophila yakuba (1%)
Eimeria tenella	8077	27
Emiliania huxleyi	9523	31.84
Euglena gracilis	14840	49.61
Galdieria sulphuraria	9140	30.56
Glaucocystis nostochinearum	10887	36.4
Guillardia theta	10825	36.19
Gymnophrys cometa	4152	13.88
Hartmannella vermiformis	11981	40
Histiona aroides	6350	21.23
Homo sapiens	29811	99.67
Isochrysis galbana	12531	41.89
Jakoba	13908	46.5	Jakoba bahamensis (39%), Jakoba libera (41%)
Karlodinium micrum	9119	30.49
Leishmania	23497	78.56	Leishmania amazonensis (2%), Leishmania tarentolae (2%), Leishmania mexicana (2%), Leishmania major (72%), Leishmania infantum (6%), Leishmania enriettii (2%), Leishmania donovani (6%), Leishmania chagasi (2%), Leishmania braziliensis (15%)
Malawimonas	13391	44.77	Malawimonas californiana (43%), Malawimonas jakobiformis (51%)
Mastigamoeba balamuthi	15012	50.19
Mus musculus	29470	98.53
Neurospora crassa	27930	93.38
Oryza sativa	29192	97.6
Oxyrrhis marina	10169	34
Paramecium	24742	82.72	Paramecium caudatum (2%), Paramecium tetraurelia (79%)
Pavlova lutheri	10738	35.9
Phaeodactylum tricornum	21096	70.53
Physcomitrella patens	18075	60.43
Phytophthora	25938	86.72	Phytophthora infestans (51%), Phytophthora palmivora (1%), Phytophthora parasitica (5%), Phytophthora ramorum (7%), Phytophthora sojae (72%)
Plasmodium	25454	85.1	Plasmodium berghei (4%), Plasmodium yoelii (71%), Plasmodium falciparum (81%), Plasmodium chabaudi (2%)
Porphyra	14825	49.56	Porphyra purpurea (1%), Porphyra yezoensis (62%)
Quinqueloculina sp	6370	21.29
Reclinomonas americana	14886	49.77
Reticulomyxa filosa	9411	31.47
Schizosaccharomyces pombe	27021	90.34
Tetrahymena	26980	90.2	Tetrahymena pyriformis (8%), Tetrahymena thermophila (92%)
Thalassiosira pseudonana	27578	92.2
Theileria	21660	72.42	Theileria annulata (62%), Theileria parva (59%)
Toxoplasma gondii	19843	66.35
Trypanosoma	25063	83.8	Trypanosoma brucei (76%), Trypanosoma cruzi (66%)
Ustilago maydis	26469	88.5
